# Supplementary material for: Roles of the structural defects and the combined acidity of H3PW12O40/Zr-MCM-41 catalysts in ultralow sulfur diesel production
Source: Royal Society of Chemistry journal article supplement (doi:10.1039/d1nj04204a), 2021-12-22
Supplement: d1nj04204a1.pdf [file d1nj04204a1.pdf]

## Electronic Supplementary Information

### Roles of the structural defects and the combined acidity of H<sub>3</sub>PW<sub>12</sub>O<sub>40</sub>/Zr-MCM-41 catalysts in ultralow sulfur diesel production

Lifang Chen<sup>a,\*</sup>, Jin An Wang<sup>a</sup>, Natali de la Fuente<sup>a</sup>, Sinong Zhou<sup>b</sup>, Jiang Peng<sup>b</sup>, Yueqin Song<sup>b</sup>, Xiaolong Zhou<sup>b</sup>

<sup>a</sup>ESIQIE, Instituto Politécnico Nacional, Av. Instituto Politécnico Nacional s/n, Col. Zacatenco, 07738 Mexico City, Mexico

<sup>b</sup>International Joint Research Center of Green Energy and Chemical Engineering, Institute of Chemical Engineering, East China University of Science & Technology, Shanghai 200237, China

\*Email: [lchen@ipn.mx](mailto:lchen@ipn.mx)

#### 1. Low angle XRD analysis

In comparison with the XRD pattern of pure MCM-41-I and MCM-41-II samples, the (100) peak in the XRD patterns of the Zr doped ZrM-I and ZrM-II samples slightly shifts toward the low two-theta region. This indicates that Zr<sup>4+</sup> inserted into the structure of MCM-41 (SI Figures 1 and 2).

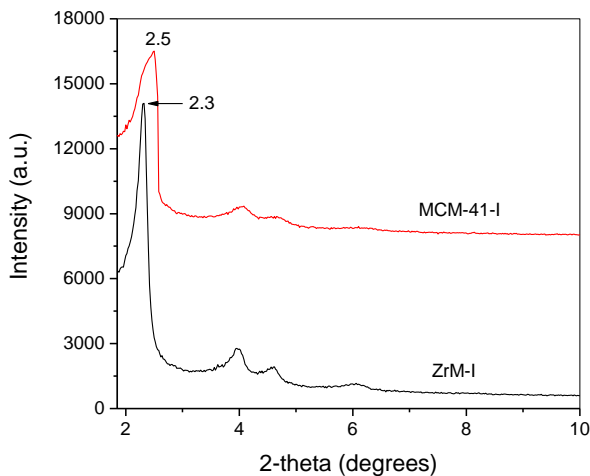

SI Figure 1. Low angle XRD patterns of MCM-41-I and Zr-MCM-41-I (ZrM-I). Fumed silica was used as Si precursor and tetrabutylammonium hydroxide (TBAOH) aqueous solution as precipitating agent in the synthesis.

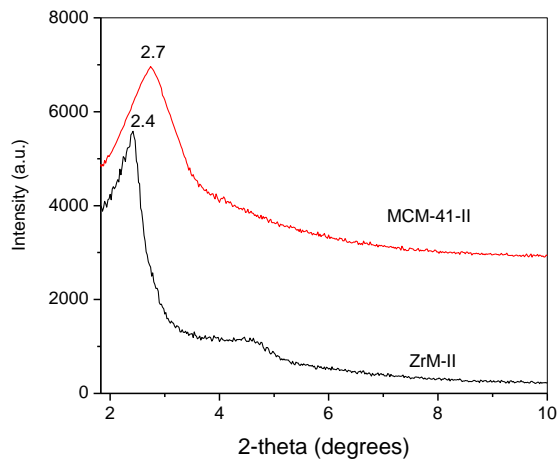

SI Figure 2. Low angle XRD patterns of MCM-41-II and Zr-MCM-41-II (ZrM-II). Tetraethylorthosilicate (TEOS) was used as Si precursor and  $\text{NH}_3 \cdot \text{H}_2\text{O}$  (28 wt%) was used as precipitating agent.

## 2. FTIR characterization

We also performed the FTIR characterization (SI Figure 3), where it was found that the IR band at  $920 \text{ cm}^{-1}$  in MCM-41 red-shifts to  $980 \text{ cm}^{-1}$  approximately for both ZrM-I and ZrM-II samples, confirming that after  $\text{Zr}^{4+}$  doping, the  $\text{Zr}^{4+}$  inserted into the MCM-41 framework.

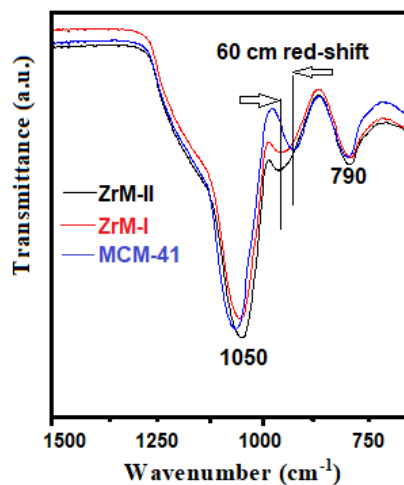

SI Figure 3. FTIR spectra of the MCM-41 and ZrM-I and ZrM-II samples
